# Supplementary material for: Pilot Study to Develop and Test Palliative Care Quality Indicators for Nursing Homes
Source: Int J Environ Res Public Health. 2021 Jan 19;18(2):829. doi: 10.3390/ijerph18020829 (PMC7835963; doi:10.3390/ijerph18020829)
Supplement: Supplementary file 1 [file ijerph-18-00829-s001.pdf]

**Table S1: list of quality indicators with numerators, denominators and questions**

| <b>Domain: Physical aspects of care</b>                           |                                         |                                                                                                                                                                                                                                                                   |                   |                                                                                                                                                                                                                                                    |                                                                                                            |
|-------------------------------------------------------------------|-----------------------------------------|-------------------------------------------------------------------------------------------------------------------------------------------------------------------------------------------------------------------------------------------------------------------|-------------------|----------------------------------------------------------------------------------------------------------------------------------------------------------------------------------------------------------------------------------------------------|------------------------------------------------------------------------------------------------------------|
| <u>N°</u>                                                         | <u>Short title</u>                      | <u>Numerator and denominator of the indicator</u>                                                                                                                                                                                                                 | <u>Respondent</u> | <u>Question</u>                                                                                                                                                                                                                                    | <u>Evidence</u>                                                                                            |
| PC-1                                                              | Being in pain                           | Numerator: Number of residents with a pain score of 3 or more in the last three days<br>Denominator: all residents who stayed longer than 1 month in the nursing home, with whom the indicator was measured                                                       | Residents         | Please tick the box that best describes how pain has affected you over the past 3 days: <ul style="list-style-type: none"> <li>• not at all,</li> <li>• slightly,</li> <li>• moderately,</li> <li>• severely,</li> <li>• overwhelmingly</li> </ul> | Indicator developed by researchers and expert panel<br><br>Measurement question from "IPOS-5"              |
| <b>Domain: Psychological, social or spiritual aspects of care</b> |                                         |                                                                                                                                                                                                                                                                   |                   |                                                                                                                                                                                                                                                    |                                                                                                            |
| <u>N°</u>                                                         | <u>Short title</u>                      | <u>Numerator and denominator of the indicator</u>                                                                                                                                                                                                                 | <u>Respondent</u> | <u>Question</u>                                                                                                                                                                                                                                    | <u>Source</u>                                                                                              |
| PC-2                                                              | Feeling worried or anxious, or a burden | Numerator: Number of residents who indicate they were most of the times or always feeling worried or anxious, or a burden to others<br>Denominator: all residents who stayed longer than 1 month in the nursing home, with whom the indicator was measured        | Residents         | Are you feeling worried or anxious, or a burden to others? <ul style="list-style-type: none"> <li>• always</li> <li>• often</li> <li>• sometimes</li> <li>• rarely</li> </ul>                                                                      | Indicator developed by researchers and expert panel<br><br>Measurement question adapted from "ICECAP-SCM"  |
| PC-3                                                              | Being around people who care about you  | Numerator: Number of residents who indicate that they were most of the times or always able to be around people who cared about them<br>Denominator: all residents who stayed longer than 1 month in the nursing home, with whom the indicator was measured       | Residents         | If I want to, I am able to be with people who care about me: <ul style="list-style-type: none"> <li>• most of the time</li> <li>• some of the time</li> <li>• only a little of the time</li> <li>• never</li> </ul>                                | Indicator developed by researchers and expert panel<br><br>Measurement question from "ICECAP-SCM"          |
| <b>Domain: Autonomy and dignity</b>                               |                                         |                                                                                                                                                                                                                                                                   |                   |                                                                                                                                                                                                                                                    |                                                                                                            |
| <u>N°</u>                                                         | <u>Short title</u>                      | <u>Numerator and denominator of the indicator</u>                                                                                                                                                                                                                 | <u>Respondent</u> | <u>Question</u>                                                                                                                                                                                                                                    | <u>Source</u>                                                                                              |
| PC-4                                                              | Personal wishes and beliefs respected   | Numerator: Number of residents who indicate that their caregivers most of the times or always respecting their personal wishes and beliefs<br>Denominator: all residents who stayed longer than 1 month in the nursing home, with whom the indicator was measured | Residents         | Do your professional carers take your personal wishes and beliefs into account? <ul style="list-style-type: none"> <li>• most of the time</li> <li>• some of the time</li> <li>• only a little of the time</li> <li>• never</li> </ul>             | Indicator originally from Claessen et al: "extent to which patients experience respect for their autonomy" |

|                                             |                                                  |                                                                                                                                                                                                                                                                                                 |                   |                                                                                                                                                                                                                                                                                                                                                                         |                                                                                                                                                                                                                                                               |
|---------------------------------------------|--------------------------------------------------|-------------------------------------------------------------------------------------------------------------------------------------------------------------------------------------------------------------------------------------------------------------------------------------------------|-------------------|-------------------------------------------------------------------------------------------------------------------------------------------------------------------------------------------------------------------------------------------------------------------------------------------------------------------------------------------------------------------------|---------------------------------------------------------------------------------------------------------------------------------------------------------------------------------------------------------------------------------------------------------------|
|                                             |                                                  |                                                                                                                                                                                                                                                                                                 |                   |                                                                                                                                                                                                                                                                                                                                                                         | Measurement question from “QPAC study”                                                                                                                                                                                                                        |
| PC-5                                        | Decisions about life and care                    | Numerator: Number of residents who indicate that they most of the times or always can make their own decisions about their life and care<br>Denominator: all residents who stayed longer than 1 month in the nursing home, with whom the indicator was measured                                 | Residents         | I am able to make decisions that I need to make about my life and care: <ul style="list-style-type: none"> <li>• most of the time</li> <li>• some of the time</li> <li>• only a little of the time</li> <li>• never</li> </ul>                                                                                                                                          | Indicator developed by researchers and expert panel<br><br>Measurement question from “ICECAP-SCM”                                                                                                                                                             |
| PC-6                                        | Treated with respect                             | Numerator: Number of residents who indicate that they most of the times or always were treated with respect<br>Denominator: all residents who stayed longer than 1 month in the nursing home, with whom the indicator was measured                                                              | Residents         | Do you feel treated with respect? (respectfully addressed, respect for beliefs, being yourself, having privacy): <ul style="list-style-type: none"> <li>• most of the time</li> <li>• some of the time</li> <li>• only a little of the time</li> <li>• never</li> </ul>                                                                                                 | Indicator developed by researchers and expert panel<br><br>Measurement question adapted from “ICECAP-SCM”                                                                                                                                                     |
| <b>Domain: Communication with residents</b> |                                                  |                                                                                                                                                                                                                                                                                                 |                   |                                                                                                                                                                                                                                                                                                                                                                         |                                                                                                                                                                                                                                                               |
| <u>N°</u>                                   | <u>Short title</u>                               | <u>Numerator and denominator of the indicator</u>                                                                                                                                                                                                                                               | <u>Respondent</u> | <u>Question</u>                                                                                                                                                                                                                                                                                                                                                         | <u>Source</u>                                                                                                                                                                                                                                                 |
| ACP-1                                       | Information comprehensible and not contradictory | Numerator: Number of residents who indicate that they most of the times or always receive comprehensible information and almost never of never contradictory information<br>Denominator: all residents who stayed longer than 1 month in the nursing home, with whom the indicator was measured | Residents         | Do your professional carers explain things to you understandably? <ul style="list-style-type: none"> <li>• Never</li> <li>• Sometimes</li> <li>• Usually</li> <li>• Always</li> </ul> Do your professional carers give you conflicting information? <ul style="list-style-type: none"> <li>• Never</li> <li>• Sometimes</li> <li>• Usually</li> <li>• Always</li> </ul> | Indicator originally from Claessen et al: “extent to which patients indicate that they receive understandable explanations” and “extent to which patients indicate that they receive contradictory information”<br><br>Measurement question from “QPAC study” |

| Domain: Care planning                          |                                            |                                                                                                                                                                                                                                                                                                                    |                        |                                                                                                                                                                                                                                          |                                                                                                                                                                                                                                                                       |
|------------------------------------------------|--------------------------------------------|--------------------------------------------------------------------------------------------------------------------------------------------------------------------------------------------------------------------------------------------------------------------------------------------------------------------|------------------------|------------------------------------------------------------------------------------------------------------------------------------------------------------------------------------------------------------------------------------------|-----------------------------------------------------------------------------------------------------------------------------------------------------------------------------------------------------------------------------------------------------------------------|
| N°                                             | Short title                                | Numerator and denominator of the indicator                                                                                                                                                                                                                                                                         | Respondent             | Question                                                                                                                                                                                                                                 | Source                                                                                                                                                                                                                                                                |
| ACP-2                                          | Conversation with family                   | Numerator: Number of residents for whom the next-of-kin indicates that more than once a conversation took place with the caregivers, the next-of-kin and, when possible, the resident<br>Denominator: all residents who stayed longer than 1 month in the nursing home, for whom the indicator was measured        | Next-of-kin            | How often did the professional carers organize a meeting, to which you and your relative were invited?<br><br><input type="checkbox"/> More than once<br><input type="checkbox"/> Once<br><input type="checkbox"/> Never                 | Indicator adapted from QPAC study: “a conversation about their care preferences took place between the professional caregivers and family carers in the first week after admission or start of palliative care”<br><br>Measurement question adapted from “QPAC study” |
| ACP-3                                          | Knowledge about care goals and life wishes | Numerator: Number of residents for whom their professional caregiver indicates that they have knowledge about the residents’ care goals and life wishes.<br>Denominator: all residents who stayed longer than 1 month in the nursing home, for whom the indicator was measured                                     | Professional caregiver | Do you know the care goals and life wishes of this resident?<br><br><ul style="list-style-type: none"> <li>• Yes</li> <li>• No</li> </ul>                                                                                                | Indicator developed by researchers and expert panel<br><br>Measurement question developed by researchers                                                                                                                                                              |
| ACP-4                                          | Encouraging ACP                            | Numerator: Number of residents for whom their professional caregiver indicates that they often or very often encourage residents and their next-of-kins to involve in advance care planning.<br>Denominator: all residents who stayed longer than 1 month in the nursing home, for whom the indicator was measured | Professional caregiver | I encourage residents and families to complete advanced care planning:<br><br><ul style="list-style-type: none"> <li>• Very much</li> <li>• Much</li> <li>• Neither much, nor little</li> <li>• Little</li> <li>• Very little</li> </ul> | Indicator developed by researchers and expert panel<br><br>Measurement question from “PACE LTCF staff attitudes-communication and end-of-life care”                                                                                                                   |
| Domain: care and communication for next-of-kin |                                            |                                                                                                                                                                                                                                                                                                                    |                        |                                                                                                                                                                                                                                          |                                                                                                                                                                                                                                                                       |
| N°                                             | Short title                                | Numerator and denominator of the indicator                                                                                                                                                                                                                                                                         | Respondent             | Question                                                                                                                                                                                                                                 | Source                                                                                                                                                                                                                                                                |

|       |                                                  |                                                                                                                                                                                                                                                                 |             |                                                                                                                                                                                                                         |                                                                                                                                                                                                                                                                            |
|-------|--------------------------------------------------|-----------------------------------------------------------------------------------------------------------------------------------------------------------------------------------------------------------------------------------------------------------------|-------------|-------------------------------------------------------------------------------------------------------------------------------------------------------------------------------------------------------------------------|----------------------------------------------------------------------------------------------------------------------------------------------------------------------------------------------------------------------------------------------------------------------------|
| ACP-5 | Next-of-kin involved in decisions                | Numerator: Number of next-of-kin who indicate that they often or very often felt involved in the decisions taken about the resident.<br>Denominator: all residents who stayed longer than 1 month in the nursing home, for whom the indicator was measured      | Next-of-kin | I felt fully involved in all decision making of my relative: <ul style="list-style-type: none"> <li>• Very much</li> <li>• Much</li> <li>• Neither much, nor little</li> <li>• Little</li> <li>• Very little</li> </ul> | Indicator developed by researchers and expert panel<br><br>Measurement question from "SWC-EOLD"                                                                                                                                                                            |
| EOL-1 | Information about approaching death              | Numerator: umber of next-of-kin who indicate that they received the right amount of information on the approaching death of the resident.<br>Denominator: all residents who stayed longer than 1 month in the nursing home, for whom the indicator was measured | Next-of-kin | Did you get information about the impending death of your relative? <ul style="list-style-type: none"> <li>• less than necessary</li> <li>• just the right amount</li> <li>• more than necessary</li> </ul>             | Indicator of QPAC study<br>"Family received the right amount of information about the patient's approaching death"<br><br>Measurement question of "QPAC study"<br><br><i>Modified indicator from Miyashita et al: "explanation to family of patient's impending death"</i> |
| PC-7  | Attention for wishes and feelings of next-of-kin | Numerator: Number of next-of-kin who indicate that the professional caregivers had attention for their wishes and feelings.<br>Denominator: all residents who stayed longer than 1 month in the nursing home, for whom the indicator was measured               | Next-of-kin | The health care team was sensitive to my needs and feeling: <ul style="list-style-type: none"> <li>• Very much</li> <li>• Much</li> <li>• Neither much, nor little</li> <li>• Little</li> <li>• Very little</li> </ul>  | Modified indicator from Claessen: "Extent to which, according to the direct relatives, attention was paid to their own psychosocial and spiritual well-being"                                                                                                              |

|                                                         |                                  |                                                                                                                                                                                                                                                                                     |                        |                                                                                                                                                                                                                                |                                                                                                                                                                                         |
|---------------------------------------------------------|----------------------------------|-------------------------------------------------------------------------------------------------------------------------------------------------------------------------------------------------------------------------------------------------------------------------------------|------------------------|--------------------------------------------------------------------------------------------------------------------------------------------------------------------------------------------------------------------------------|-----------------------------------------------------------------------------------------------------------------------------------------------------------------------------------------|
|                                                         |                                  |                                                                                                                                                                                                                                                                                     |                        |                                                                                                                                                                                                                                | Measurement question from "SWC-EOLD"<br>SWC-EOLD                                                                                                                                        |
| EOL-2                                                   | Supported immediate after death  | Numerator: Number of next-of-kin who indicate that they felt sufficiently supported by the professional caregivers immediate after the death of the resident.<br>Denominator: all residents who stayed longer than 1 month in the nursing home, for whom the indicator was measured | Next-of-kin            | Did you feel supported by the professional carers immediately after the death of your relative?<br><ul style="list-style-type: none"> <li>• Yes</li> <li>• No</li> </ul>                                                       | Indicator from Claessen et al: "Extent to which direct relatives felt supported by the caregivers immediately after the patient's death,"<br><br>Measurement question from "QPAC study" |
| <b>Domain: Communication among caregivers</b>           |                                  |                                                                                                                                                                                                                                                                                     |                        |                                                                                                                                                                                                                                |                                                                                                                                                                                         |
| <u>N°</u>                                               | <u>Short title</u>               | <u>Numerator and denominator of the indicator</u>                                                                                                                                                                                                                                   | <u>Respondent</u>      | <u>Question</u>                                                                                                                                                                                                                | <u>Source</u>                                                                                                                                                                           |
| PC-8                                                    | Information in resident file     | Numerator: Number of residents for whom the professional caregiver finds sufficient information in the resident file when needed.<br>Denominator: all residents who stayed longer than 1 month in the nursing home, for whom the indicator was measured                             | Professional caregiver | Do you find the information on the resident in his or her file when you need it?<br><ul style="list-style-type: none"> <li>• Never</li> <li>• Sometimes</li> <li>• Usually</li> <li>• Always</li> </ul>                        | Indicator developed by researchers and expert panel<br><br>Measurement question developed by researchers                                                                                |
| <b>Domain: care and circumstances surrounding death</b> |                                  |                                                                                                                                                                                                                                                                                     |                        |                                                                                                                                                                                                                                |                                                                                                                                                                                         |
| <u>N°</u>                                               | <u>Short title</u>               | <u>Numerator and denominator of the indicator</u>                                                                                                                                                                                                                                   | <u>Respondent</u>      | <u>Question</u>                                                                                                                                                                                                                | <u>Source</u>                                                                                                                                                                           |
| EOL-3                                                   | Comfortable in last week of life | Numerator: Number of next-of-kin who indicate that many or a lot of measures were taken to make the resident comfortable in the last week of life.<br>Denominator: all residents who stayed longer than 1 month in the nursing home, for whom the indicator was measured            | Next-of-kin            | All measures were taken to keep my care recipient comfortable in the last week of life:<br><ul style="list-style-type: none"> <li>• Very much</li> <li>• Much</li> <li>• Neither much, nor little</li> <li>• Little</li> </ul> | Modified indicator from QPAC study: "symptom burden mostly or completely under control in the final week"                                                                               |

|       |                                        |                                                                                                                                                                                                                                                                                              |                        |                                                                                                                                                                                                                                                                                                                        |                                                                                                                                                     |
|-------|----------------------------------------|----------------------------------------------------------------------------------------------------------------------------------------------------------------------------------------------------------------------------------------------------------------------------------------------|------------------------|------------------------------------------------------------------------------------------------------------------------------------------------------------------------------------------------------------------------------------------------------------------------------------------------------------------------|-----------------------------------------------------------------------------------------------------------------------------------------------------|
|       |                                        |                                                                                                                                                                                                                                                                                              |                        | <ul style="list-style-type: none"> <li>• Very little</li> </ul>                                                                                                                                                                                                                                                        | of life”<br><br>Measurement question adapted from “SWC-EOLD”                                                                                        |
| EOL-4 | Recognizing the approaching death      | Numerator: Number of residents for whom the professional caregiver indicates they could recognize the approaching death well or very well by physical changes.<br>Denominator: all residents who stayed longer than 1 month in the nursing home, for whom the indicator was measured         | Professional caregiver | I can recognize impending death (physical changes): <ul style="list-style-type: none"> <li>• Very good</li> <li>• Good</li> <li>• Neither good, nor bad</li> <li>• Bad</li> <li>• Very bad</li> </ul>                                                                                                                  | Indicator developed by researchers and expert panel<br><br>Measurement question from “PACE LTCF staff attitudes-communication and end-of-life care” |
| EOL-5 | Satisfied by care delivered            | Numerator: Number of residents for whom the professional caregiver indicates they are satisfied with the care delivered to the resident.<br>Denominator: all residents who stayed longer than 1 month in the nursing home, for whom the indicator was measured                               | Professional caregiver | Are you satisfied by the care that you and your and your team members delivered to the resident? <ul style="list-style-type: none"> <li>• Very satisfied</li> <li>• Satisfied</li> <li>• Neither satisfied, nor dissatisfied</li> <li>• Dissatisfied</li> <li>• Very dissatisfied</li> </ul>                           | Indicator developed by researchers and expert panel<br><br>Measurement question from “PACE LTCF staff attitudes-communication and end-of-life care” |
| EOL-6 | Support by specialized palliative care | Numerator: Number of residents for whom the professional caregiver indicates a palliative care referent or specialized team was involved in the care for the resident.<br>Denominator: all residents who stayed longer than 1 month in the nursing home, for whom the indicator was measured | Professional caregiver | Was a specialized palliative care team involved in the care of this resident? (the specialized care team of the nursing home or an external team) <ul style="list-style-type: none"> <li>• Yes, the palliative care team of the nursing home</li> <li>• Yes, an external palliative care team</li> <li>• No</li> </ul> | Indicator developed by researchers and expert panel<br><br>Measurement question developed by researchers                                            |
